# Supplementary material
Source: Springer Nature journal article supplement (https://www.springermedizin.de/resource/supplementary/12987_2008_296_MOESM2_ESM.pdf/9611704)

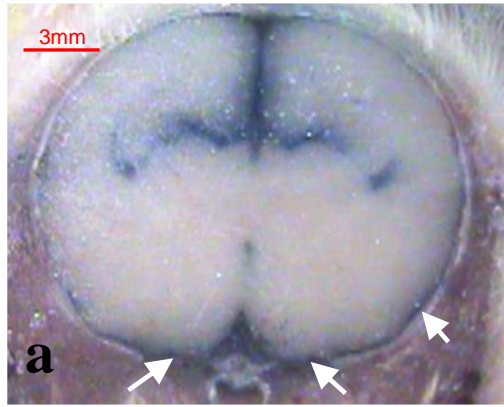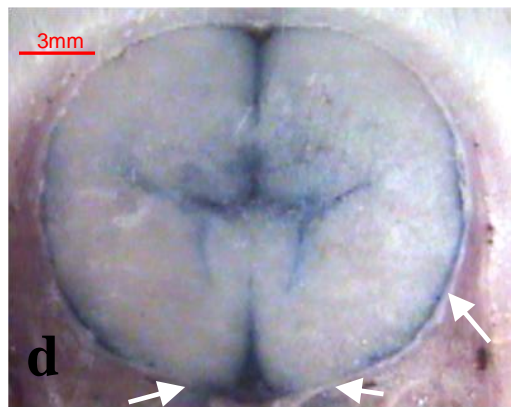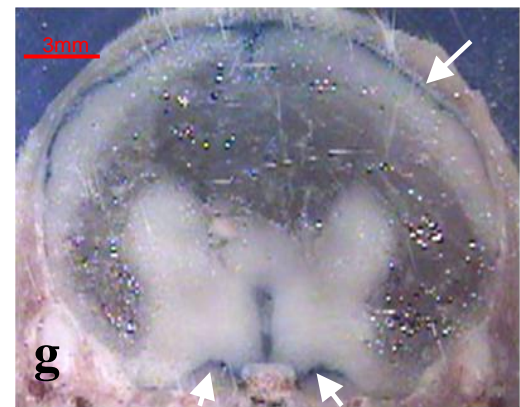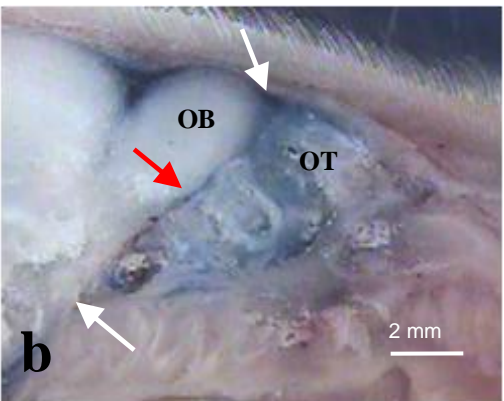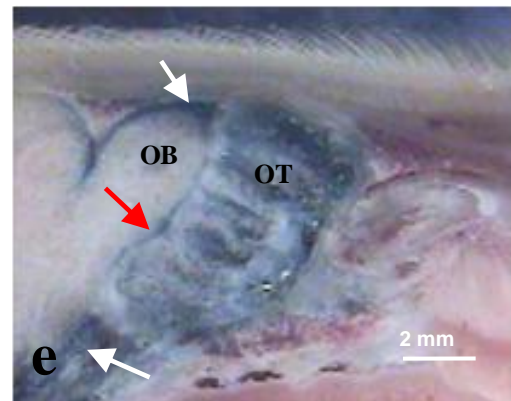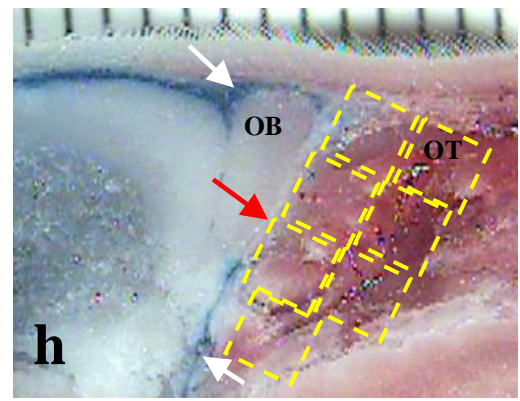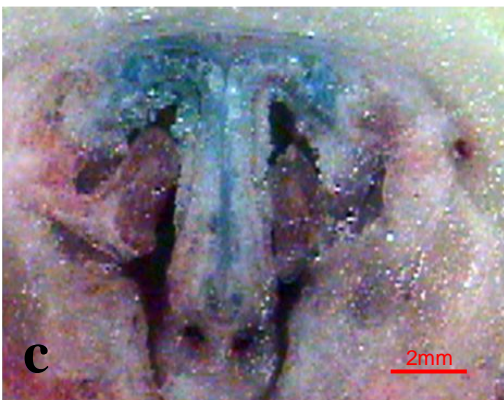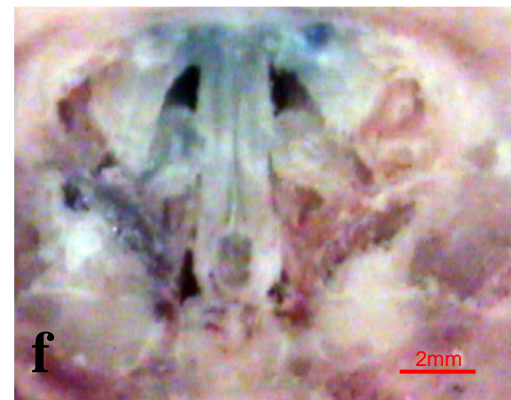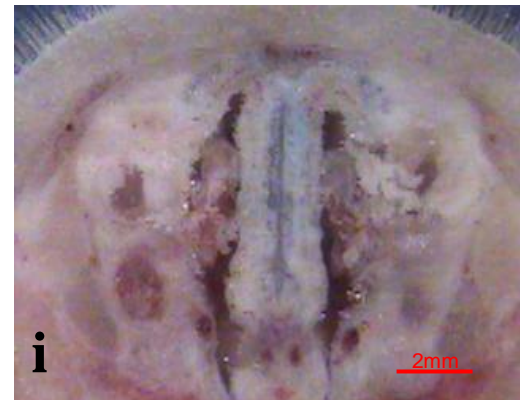

**P10 SD**

**P10 HTX**

**P10 HC**

Supplement: MOESM2 [file 9611704]
